# Supplementary material for: Do Nutrients and Nutraceuticals Play a Role in Diabetic Retinopathy? A Systematic Review
Source: MDPI journal article supplement (doi:10.3390/nu14204430), 2022-10-21
Supplement: s1 [file s1]

**Supplementary Table S2. Differences in gender, age and diabetes duration in diabetic subjects with and without retinopathy in the observational studies**

|                            | Gender<br>(M/F or M%) |           | Age<br>(years) |            | Diabetes duration<br>(years) |           |
|----------------------------|-----------------------|-----------|----------------|------------|------------------------------|-----------|
|                            | DR                    | NDR       | DR             | NDR        | DR                           | NDR       |
| Zhao W. J.,<br>2021 [50]   | N=120/89              | N=450/329 | 61 (55-68)     | 59 (53-67) | 12 (6.7-17)                  | 7 (2-12)  |
| Gungor A.,<br>2015 [44]    | M=61%                 | M=50%     | 60.1±6.8       | 59.0±5.1   | NA                           | NA        |
| Senyigit A.,<br>2019 [71]  | NA                    | NA        | 57.5±7.6       | 54.5±9.7   | NA                           | NA        |
| Herrmann M.,<br>2015 [45]  | NA                    | NA        | NA             | NA         | NA                           | NA        |
| Bajaj S.,<br>2014 [46]     | NA                    | NA        | NA             | NA         | NA                           | NA        |
| Ahmadiéh H.,<br>2013 [47]  | NA                    | NA        | NA             | NA         | NA                           | NA        |
| Kaur H.,<br>2011 [48]      | NA                    | NA        | NA             | NA         | NA                           | NA        |
| Butler A.E.,<br>2020 [42]  | NA                    | NA        | NA             | NA         | NA                           | NA        |
| Ahmed L.H.M.,<br>2020 [41] | NA                    | NA        | 57.4±9.9       | 54.0±9.7   | 19.2±9.3                     | 10.7±7.9  |
| Ahmed L.H.M.,<br>2020 [49] | NA                    | NA        | NA             | NA         | NA                           | NA        |
| Millen A.E.,<br>2003 [52]  | NA                    | NA        | NA             | NA         | NA                           | NA        |
| Millen A.E.,<br>2004 [51]  | NA                    | NA        | NA             | NA         | NA                           | NA        |
| She C.,<br>2021 [53]       | 40.3%                 | 37.5%     | 63.2±8.5       | 65.4±8.8   | 13.1±8.5                     | 8.6±5.7   |
| Fahmy R.,<br>2021 [55]     | NA                    | NA        | 52.4±6.3       | 46.8±6.1   | 12.6± 8.1                    | 7.5 ± 8.1 |
| Cinici E.,<br>2020 [60]    | 30/30                 | 10/10     | 62.0±6.7       | 62.0±6.7   | NPDR: 13.1<br>PDR: 18.3      | 6.0       |

|                                       |                              |         |                                   |            |                                 |            |
|---------------------------------------|------------------------------|---------|-----------------------------------|------------|---------------------------------|------------|
| Horikawa C.,<br>2020 [62]             | NA                           | NA      | NA                                | NA         | NA                              | NA         |
| Malaguarnera G.,<br>2015 [63]         | 75/70                        | 55/41   | NPDR: 64.1±10.8<br>PDR: 65.8±10.4 | 56.8±10.2  | NA                              | NA         |
| Satyanarayana A.,<br>2011 [61]        | M=55%                        | M=56%   | 55.7±8.2                          | 54.7±9.3   | 11.0±6.9                        | 10.2±6.9   |
| Srivastav K.,<br>2016 [59]            | NPDR: N=13/7<br>PDR: N=10/10 | N=12/8  | NPDR: 54.3±6.9<br>PDR: 51.0±7.2   | 56.0±6.7   | NPDR: 11.7±6.8<br>PDR: 11.7±6.4 | 6.0±7.0    |
| de Luis D.A.,<br>2005 [64]            | NA                           | NA      | NA                                | NA         | NA                              | NA         |
| Zhou Q.,<br>2018 [54]                 | NA                           | NA      | NA                                | NA         | NA                              | NA         |
| Yildirim Z.,<br>2007 [56]             | NPDR: N=12/13<br>PDR: N=8/17 | N=12/13 | NPDR: 63.5±9.0<br>PDR: 59.0±8.0   | 67.8±10.0  | NA                              | NA         |
| Ba-Ali S.,<br>2018 [66]               | N=14/11                      | N=19/10 | 61.6±9.1                          | 63.1 ± 8.3 | 29.0±9.3                        | 29.2 ±10.0 |
| Hikichi T.,<br>2011 [65]              | NPDR: N=5/11<br>PDR: N=6/8   | N=10/16 | NPDR: 72.0±8.0<br>PDR: 56.0±12.0  | 66.0±11.0  | NPDR: 14.0±7.0<br>PDR: 10.0±6.0 | NA         |
| Poorabbas A.,<br>2007 [67]            | NA                           | NA      | NA                                | NA         | NA                              | NA         |
| Hattenbach L.O.,<br>2000 [57]         | NA                           | NA      | NA                                | NA         | NA                              | NA         |
| Pękala-Wojciechowska A.,<br>2018 [58] | NA                           | NA      | NA                                | NA         | NA                              | NA         |

Data are presented as mean ± SD or median and interquartile range.

Abbreviations: M, male; F, female; DR, Diabetic Retinopathy; NDR, None Diabetic Retinopathy PDR, Proliferative Diabetic Retinopathy; NPDR, Non Proliferative Diabetic Retinopathy; NA, not available
